# Supplementary material for: Genome-Wide Association Meta-analysis Identifies Novel Variants Associated With Fasting Plasma Glucose in East Asians
Source: Oxford University Press journal article supplement (doi:10.2337/db14-0563), 2014-09-03
Supplement: db140563supplementarydata2.xlsx [file db140563supplementarydata2.xlsx]

## Sheet: Suppl Table 1
Supplementary Table 1. Descriptive characteristics of cohort studies
Stage	Study	Ethnic group	N	Study design	Females (%)	Mean age (years)	FPG (mmol/L)	BMI (kg/m2)
Stage 1 : discovery
KNIH	KARE	Korean	7696	Population-based, prospective	53.4304	51.6 ± 8.8	4.6 ± 0.5	24.5 ± 3.1
	HEXA	Korean	3385	Population-based	57.0753	52.7 ± 8.2	5.0 ± 0.6	23.9 ± 2.9
	CAVAS	Korean	3205	Population-based	61.3729	60.3 ± 10.0	5.2 ± 0.5	23.7 ± 3.1
NUS	SP2(1)	Chinese	933	Population-based	36	46.8 ± 10.2	4.7 ± 0.5	NA
	SP2(2)	Chinese	1044	Population-based	78.1	47.8 ± 11.1	4.7 ± 0.5	NA
	SP2(3)	Chinese	305	Population-based	23	49.0 ± 12.5	4.8 ± 0.5	NA
VU/SCI	SBCS	Chinese	2017	Population-based	100	49.9 ± 8.5	5.3 ± 2.1	23.3 ± 3.4
	SMHS	Chinese	291	Population-based	0	61.6 ± 9.0	5.7 ± 1.4	23.5 ± 3.1
Tulane U	GenSalt	Han Chinese	1832	Family-based	NA	38.6 ± 9.5	4.8 ± 0.6	23.3 ± 3.2
NCGM	CAGE	Japanese	756	Case-control multicenter; population-based	45.6349	65.1 ± 7.4	5.3 ± 0.5	22.9 ± 2.9
UNC	CLHNS	Filipino	1624	Population-based	100	48.3 ± 6.1	5.0 ± 0.6	24.2 ± 4.3
Harvard U	CRC	Chinese	733	population-based	76.2619	43.7 ± 7.8	4.9 ± 0.4	22.2 ± 2.2
Yonsei U	KCPS-II	Korean	919	population-based	44.9402	41.1 ± 8.2	5.1 ± 0.5	23.5 ± 3.1
Stage 1 Total			24740
Stage 2 : de novo replication
KNIH	Health2	Korean	5277	Population-based	51.715	57.8 ± 7.2	5.1 ± 0.5	24.3 ± 3.1
RIKEN/UT	BBJ	Japanese	1883	case-control	47.1057	60.8	5.2	23.2
SJTU	SJTUDS	Han Chinese	3412	Population-based	60.0234	50.1 ± 14.3	5.0 ± 0.5	23.5 ± 3.3
Ehime U	JMGP	Japanese	10299	Population-based	52	56.7 ± 13.0	5.3 ± 0.6	23.0 ± 3.1
CUHK	CUHKS	Han Chinese	474	case-control	55.0633	41.8 ± 8.9	4.8 ± 0.4	23.1 ± 3.4
Stage 2 Total			21345
Overall (Stage 1 + 2)	AGEN	East Asian	46085
KNIH, Korea National Institute of Health; NUS, National University of Singapore; VU, Vanderbilt University; SCI, Shanghai Cancer Institute; Tulane U, Tulane University; NCGM, National Center for Global Health and Medicine; UNC, University of North Carolina; Harvard U, Harvard University; Yonsei U, Yonsei University; UT, The University of Tokyo; SJTU, Shanghai Jiao Tong University; Ehime U, Ehime …

## Sheet: Suppl Table 2
Supplementary Table 2. Information for genotyping, Imputation and association analysis
Stage	Study	Genotyping					Imputation				Association
		platform	call rate	MAF	HWE P-value		Imputation Software	Reference	Imputation Quality		Total SNPs in Meta-analysis	Analysis Software	Covariate	inflation factor
Stage 1 : discovery
KNIH	KARE	Affymetrix 5.0	>95%	>1%	>1e-7		IMPUTE	HapMap rel. 22 (CHB+JPT)	proper info > 0.5		1573409	PLINK	sex, BMI and Area	1.024
	HEXA	Affymetrix 6.0	>95%	>1%	>1e-7		IMPUTE	HapMap rel. 22 (CHB+JPT)	proper info > 0.5		1982391	PLINK	sex and BMI	1.014
	CAVAS	Illumina 1M	>95%	>1%	>1e-7		IMPUTE	HapMap rel. 22 (CHB+JPT)	proper info > 0.5		2150086	PLINK	sex and BMI	1.012
NUS	SP2(1)	Illumina 1M	>95%	>1%	>1e-4		IMPUTE	HapMap rel. 22 (CHB+JPT)	proper info > 0.5		2228520	SNPTEST	sex and BMI	0.989
	SP2(2)	Illumina 610K	>95%	>1%	>1e-4		IMPUTE	HapMap rel. 22 (CHB+JPT)	proper info > 0.5		1959338	SNPTEST	sex and BMI	1.006
	SP2(3)	Illumina 550K	>95%	>1%	>1e-4		IMPUTE	HapMap rel. 22 (CHB+JPT)	proper info > 0.5		1923645	SNPTEST	sex and BMI	1.015
VU/SCI	SBCS	Affymetrix 6.0	>95%	>1%	>1e-6		MACH	HapMap rel. 22 (CHB+JPT)	r2-hat>0.3		2293675	MACH2QTL	sex and BMI	1.013
	SMHS	Affymetrix 6.0/Illumina 660K	>95%	>1%	>1e-6		MACH	HapMap rel. 22 (CHB+JPT)	r2-hat>0.3		1871838	MACH2QTL	sex and BMI	1.014
Tulane U	GenSalt	Affymetrix 6.0	>90%	>1%	>1e-6		MACH	HapMap rel. 22 (CHB+JPT)	r2-hat>0.3		2193888	SAS	sex and BMI	1.029
NCGM	CAGE	Illumina 550K	>95%	>1%	>1e-7		BEAGLE	HapMap rel. 24 (CHB+JPT)	proper info > 0.5		1988685	PLINK	sex, BMI and site	1
UNC	CLHNS	Affymetrix 5.0	>90%	>1%	>1e-6		MACH	HapMap rel. 21 (CHB+JPT+CEU)	r2-hat>0.3		2003024	MACH2QTL	sex and BMI	1.029
Harvard U	CRC	Illumina 610K	>95%	>1%	>1e-5		MACH	HapMap rel. 22 (CHB+JPT)	r2-hat>0.3		2315813	ProbABEL	sex and BMI	1.009
Yonsei U	KCPS-II	Affymetrix 5.0	>90%	>1%	>1e-4		MACH	HapMap rel. 22 (CHB+JPT)	r2-hat>0.3		1500837	PLINK	sex and BMI	1.02
Overall														1.06
Stage 2 : de novo replication
KNIH	Health2	TaqMan	-	-	-		-	-	-		-	SAS	sex and BMI	-
RIKEN/UT	BBJ	Multiplex-PCR-invader assay	-	-	-		-	-	-		-	R	sex and BMI	-
SJTU	SJTUDS	MassARRAY	-	-	-		-	-	-		-	PLINK	sex and BMI	-
Ehime U	JMGP	TaqMan	-	-	-		-	-	-		-	JMP	sex and BMI	-
CUHK	CUHKS	Sequenom MassARRAY	-	-	-		-	-	-		-	PLINK, SAS	sex and BMI	-
KNIH, Korea National Institute of Health; NUS, National University of Singapore; VU, Vanderbilt University; SCI, Shanghai Cancer Institute; Tulane U, Tulane University; NCGM, National Center for Global Health and Medicine; UNC, University of North Carolina; Harvard U, Harvard University; Yonsei U, Yonsei University; UT, The University of Tokyo; SJTU, Shanghai Jiao Tong University; Ehime U, Ehime …

## Sheet: Suppl Table 3
Supplementary Table 3. Association results of stage 1 meta-analysis for established FPG loci
Locus	Chr	Previously reported study							AGEN (Stage 1 meta-analysis)
		SNP	EA(F)	β ± s.e.m.	P-value	Sample size	Reference		SNP	EA(F)	β ± s.e.m.	P-value	Sample size
PROX1	1	rs340874	C (0.52)	+	6.6e-12	116882	27		rs340874	C (0.35)	0.033 ± 0.009	0.0004386	24458
SIX2-SIX3	2	rs895636	T (0.38)	0.039 ± 0.006	9.99e-13	17617	2		rs895636	T (0.39)	0.069 ± 0.01	2.529e-13	23194
GCKR	2	rs780094	C (0.62)	+	5.6e-38	118032	27		rs780094	C (0.39)	0.052 ± 0.009	3.578e-09	24704
G6PC2	2	rs560887	C (0.70)	+	8.7e-218	119169	27		rs13387347	C (0.53)	0.114 ± 0.009	2.352e-36	24259
DPYSL5	2	rs1371614	T (0.25)	+	2.3e-12	96496	28		rs1371614	T (0.18)	0.021 ± 0.016	0.1912	13470
IGF2BP2	3	rs7651090	G (0.31)	0.013 ± 0.002	1.75e-08	128548	29		rs7651090	G (0.27)	0.027 ± 0.011	0.009818	21540
AMT	3	rs11715915	C (0.68)	0.012 ± 0.002	4.9e-08	131523	29		rs11715915	C (0.90)	0.010 ± 0.017	0.5479	24713
ADCY5	3	rs11708067	A (0.78)	+	7.1e-22	118475	27		rs11708067	A (1.00)	NA	NA	NA
SLC2A2	3	rs11920090	A (0.68)	+	8.1e-13	119024	27		rs11920090	A (0.98)	0.012 ± 0.094	0.8957	5392
PCSK1	5	rs4869272	T (0.69)	0.018 ± 0.002	1e-15	131872	29		rs4869272	T (0.70)	0.004 ± 0.010	0.7134	24724
ZBED3	5	rs7708285	G (0.27)	0.015 ± 0.003	1.2e-08	117931	29		rs7708285	A (0.95)	0.007 ± 0.042	0.8742	6939
CDKAL1	6	rs9368222	A (0.28)	0.014 ± 0.002	1e-09	128453	29		rs9368222	A (0.40)	0.056 ± 0.009	1.634e-09	23725
RREB1	6	rs17762454	T (0.26)	0.014 ± 0.002	9.6e-09	123247	29		rs17762454	T (0.49)	0.010 ± 0.014	0.4919	10331
GCK	7	rs4607517	A (0.16)	+	6.5e-92	118500	27		rs4607517	A (0.21)	0.108 ± 0.011	2.356e-22	23934
DGKB-TMEM195	7	rs2191349	T (0.52)	+	3e-44	122743	27		rs2191349	T (0.72)	0.064 ± 0.010	2.68e-10	22201
GRB10	7	rs6943153	T (0.34)	0.015 ± 0.002	1.6e-12	131795	29		rs10265504	T (0.29)	0.024 ± 0.010	0.01407	24602
SLC30A8	8	rs11558471	A (0.68)	+	2.6e-11	45996	27		rs11558471	A (0.54)	0.063 ± 0.009	6.71e-12	24615
PPP1R3B	8	rs983309	T (0.12)	0.026 ± 0.003	6.3e-15	127470	29		rs983309	T (0.02)	0.156 ± 0.056	0.005404	9506
CDKN2A/B	9	rs10811661	T (0.82)	0.024 ± 0.003	5.6e-18	128488	29		rs10811661	T (0.55)	0.062 ± 0.009	8.656e-12	23741
GLIS3	9	rs7034200	A (0.49)	+	1e-12	106250	27		rs7034200	A (0.38)	0.052 ± 0.009	7.873e-09	24565
DNLZ	9	rs3829109	G (0.71)	0.017 ± 0.003	1.1e-10	115310	29		rs3829109	G (0.92)	0.065 ± 0.042	0.1275	6687
IKBKAP	9	rs16913693	T (0.97)	0.043 ± 0.007	3.5e-11	125115	29		rs16913693	T (1.00)	NA	NA	NA
ADRA2A	10	rs10885122	G (0.87)	+	2.9e-16	118410	27		rs10787316	G (0.71)	0.036 ± 0.016	0.025	24743
TCF7L2	10	rs12243326	C (0.21)	0.08 ± 0.01	4.23e-10	30,337-43,104	30		rs12243326	C (0.02)	0.001 ± 0.088	0.9937	6468
MTNR1B	11	rs10830963	G (0.30)	+	5.8e-175	112844	27		rs3847554	G (0.44)	0.059 ± 0.009	2.196e-11	24744
FADS1	11	rs174550	T (0.64)	+	1.7e-15	118908	27		rs174550	T (0.67)	0.045 ± 0.010	2.671e-06	24730
ARAP1	11	rs11603334	G (0.83)	0.019 ± 0.003	1.1e-11	128139	29		rs11603334	G (0.94)	0.062 ± 0.018	0.0005071	24666
CRY2	11	rs11605924	A (0.49)	+	1e-14	116479	27		rs11605924	A (0.78)	0.015 ± 0.011	0.1926	22736
MADD	11	rs7944584	A (0.75)	+	2e-18	118741	27		rs7944584	T (0.04)	0.032 ± 0.034	0.3439	16971
OR4S1	11	rs1483121	G (0.86)	+	1.6e-08	96496	28		rs1483121	G (1.00)	NA	NA	NA
GLS2	12	rs2657879	G (0.18)	0.016 ± 0.003	3.9e-08	121596	29		rs2657879	G (0.10)	0.017 ± 0.015	0.2301	24739
P2RX2	12	rs10747083	A (0.66)	0.013 ± 0.002	7.6e-09	127111	29		rs10747083	A (0.81)	NA	NA	NA
KL	13	rs576674	G (0.15)	0.017 ± 0.003	2.3e-08	131856	29		rs576674	G (0.13)	0.057 ± 0.016	0.0003156	14220
PDX1	13	rs11619319	G (0.23)	0.02 ± 0.002	1.3e-15	132996	29		rs11619319	G (0.45)	0.026 ± 0.009	0.003007	24708
WARS	14	rs3783347	G (0.79)	0.017 ± 0.003	1.3e-10	132544	29		rs3783347	G (0.88)	0.035 ± 0.014	0.01028	23867
VPS13C	15	rs17271305	G (0.42)	0.06 ± 0.01	4.11e-08	30,337-43,104	30		rs17271305	G (0.12)	0.029 ± 0.013	0.02621	24667
C2CD4B	15	rs11071657	A (0.63)	+	3.6e-08	114454	27		rs11071657	G (0.33)	0.003 ± 0.015	0.8215	10446
GIPR	19	rs2302593	C (0.50)	0.014 ± 0.002	9.3e-10	116141	29		rs2302593	C (0.60)	0.034 ± 0.017	0.04527	6790
FOXA2	20	rs6113722	G (0.96)	0.035 ± 0.005	2.5e-11	123665	29		rs6048216	G (0.85)	0.095 ± 0.013	1.913e-12	23800
TOP1	20	rs6072275	A (0.16)	0.016 ± 0.003	1.7e-08	128616	29		rs6072275	A (0.00)	NA	NA	NA
EA(F), effect allele (frequency); s.e.m., standard error mean; NA, not available; + indicates the positive effect direction.

## Sheet: Suppl Table 4
Supplementary Table 4. Evidence of association of 3 new loci with fasting plasma glucose in Europeans from the MAGIC consortium
Marker name	Chr	Candidate gene	Effect allele	Other allele		AGEN				MAGIC
						EAF	β ± s.e.m	P-value		EAF	β ± s.e.m	P-value
rs733331	2	PDK1-RAPGEF4	A	G		0.55618	0.048 ± 0.009	7.18e-08		0.009	0.005 ± 0.010	0.6229
rs10815355	9	KANK1	T	G		0.216667	0.074 ± 0.012	3.727e-10		0	NA	NA
rs2018860	15	IGF1R	A	T		0.460674	0.050 ± 0.009	1.716e-08		0.35	0.011 ± 0.004	0.004117
Sample size in AGEN was up to 46,085. Sample size in MAGIC was about 46,186. EAF, effect allele frequency; NA, not available.

## Sheet: Suppl Table 5
Supplementary Table 5. Associations for two KANK1 variants with glucose and proinsulin levels in 8,633 METSIM samples
Trait	Initial Analysis					Reciprocal Conditional Analysis
	rs10815355		rs3824420 [Arg667His]			rs10815355		rs3824420 [Arg667His]
	β ± s.e.m	P-value	β ± s.e.m	P		β ± s.e.m	P-value	β ± s.e.m	P-value
Fasting glucose	0.05 ± 0.04	0.2	0.02 ± 0.05	0.65		0.26 ± 0.11	0.02	-0.24 ± 0.12	0.051
Fasting proinsulin	0.27 ± 0.04	3.6e-10	0.29 ± 0.05	3.1e-10		0.16 ± 0.11	0.16	0.13 ± 0.12	0.29
Proinsulin AUC total	0.22 ± 0.04	2.9e-07	0.24 ± 0.05	1.1e-07		0.08 ± 0.11	0.5	0.16 ± 0.12	0.18
Proinsulin AUC0-30	0.26 ± 0.04	2.2e-09	0.27 ± 0.05	2.1e-09		0.16 ± 0.11	0.15	0.10 ± 0.12	0.39
Proinsulin AUC0-120	0.21 ± 0.04	9e-07	0.24 ± 0.05	3.1e-07		0.06 ± 0.11	0.58	0.17 ± 0.12	0.17
Proinsulin values were natural log transformed and adjusted for fasting insulin, body mass index, age and age squared. Effect allele: the minor allele of rs10815355 (T allele; freq = 0.034) and rs3824420 (A allele; freq = 0.027), LD (r2/D') = 0.787/1.000 in METSIM. In the reciprocal conditional analysis, the two variants were put in the same model, to test for the residual association after accou…

## Sheet: Suppl Table 6
Supplementary Table 6. Comparison of SNP minor allele frequency and linkage disequilibrium among ethnic groups
SNP ID (MA)	MAF				r2				D'
	CHB/JPT	CEU	METSIM		CHB/JPT	CEU	METSIM		CHB/JPT	CEU	METSIM
rs10815355 (T)	0.217	0	0.034		0.087	na	0.787		0.362	na	1
rs3824420 (A)	0.14	0.006	0.027
MA, minor allele; MAF, minor allele frequency; METSIM, Metabolic Syndrome in Men Study; MAF and pairwise-LD values were available from HapMap

## Sheet: Suppl Table 7 
Supplementary Table 7. Association of SNPs rs10815355 and rs3824420 with insulin-related traits such as fasting insulin and homeostatic model for assessment of beta-cell function (HOMA-B) in KARE study
Study cohort	Marker name	Chr	Position	Minor allele	Major allele	MAF	Trait	β ± s.e.m	P-value	Sample size	Power
KARE	rs10815355	9	612523	T	G	0.16	FPI	0.730 ± 0.620	0.2394	7183	0.21
							HOMA-B	-0.553 ± 0.919	0.5473	7151	0.09
	rs3824420	9	702766	A	G	0.11	FPI	0.884 ± 0.765	0.2481	6648	0.21
							HOMA-B	-0.416 ± 1.144	0.716	6620	0.07
The power was estimated given the sample size, the effect size, the population mean variable and the minor allele frequency in KARE study for α=0.05. MAF, minor allele frequency; FPI, fasting plasma insulin; HOMA-B, homeostatic model for assessment of beta-cell function; s.e.m., standard error mean

## Sheet: Suppl Table 8
Supplementary Table 8. Conditional analyses for SNPs, rs10815355 and rs3824420. Association analysis of one SNP for fasting glucose was adjusted with the other SNP.
Study Cohort	SNP ID	Chr	position	Effect allele	Other allele		EAF	N	β ± s.e.m	Unadjusted P-value		Conditional analysis
												conditional SNP	β ± s.e.m	Adjusted P-value
KARE	rs10815355	9	612523	T	G		0.16	6210	0.071 ± 0.026	0.006783		rs3824420	0.056 ± 0.032	0.08096
	rs3824420	9	702766	A	G		0.11	6210	0.066 ± 0.029	0.02549		rs10815355	0.030 ± 0.036	0.4005
HEXA	rs10815355	9	612523	T	G		0.18	3010	0.116 ± 0.033	0.0005196		rs3824420	0.109 ± 0.041	0.007244
	rs3824420	9	702766	A	G		0.12	3010	0.084 ± 0.038	0.02664		rs10815355	0.013 ±0.046	0.7719
CAVAS	rs10815355	9	612523	T	G		0.17	2958	0.114 ± 0.034	0.0007055		rs3824420	0.139 ± 0.040	0.0005919
	rs3824420	9	702766	A	G		0.14	2958	0.035 ± 0.036	0.3364		rs10815355	-0.049 ± 0.044	0.2627
Joint analysis (KARE+HEXA+CAVAS)	rs10815355	9	612523	T	G		0.17	12178	0.098 ± 0.018	2.286e-08		rs3824420	0.097 ± 0.021	6.324e-06
	rs3824420	9	702766	A	G		0.12	12178	0.065 ± 0.020	0.0009789		rs10815355	0.003 ± 0.024	0.8838
EAF, effect allele frequency; s.e.m., standard error mean

## Sheet: Suppl Table 9
Supplementary Table 9. Conditional analyses for fasting glucose SNPs. The association of SNPs with fasting glucose was adjusted with insulin-related traits.
Study cohort	Marker name	Chr	Position	Effect allele	Other allele		EAF	Trait	β ± s.e.m	Unadjusted P-value		Conditional analysis
												Conditional trait	β ± s.e.m	Adjusted P-value
KARE	rs10815355	9	612523	T	G		0.16	FPG	0.071 ± 0.022	0.001109		FPI	0.069 ± 0.022	0.001324
												HOMA-B	0.065 ± 0.020	0.001323
	rs3824420	9	702766	A	G		0.11	FPG	0.066 ± 0.027	0.01526		FPI	0.064 ± 0.027	0.01899
												HOMA-B	0.067 ± 0.025	0.008539
FPI, fasting plasma insulin; HOMA-B, homeostatic model for assessment of beta-cell function; EAF, effect allele frequency; s.e.m., standard error mean

## Sheet: Suppl Table 10
Supplementary Table 10. Genetic association of 3 new FPG loci with type 2 diabetes. Results of type 2 diabetes association were obtained from AGEN-T2D consortium.
Marker Name	Chr	Candidate Gene	Effect allele	Other allele		AGEN-FPG			AGEN-T2D
						β ± s.e.m	P-value		OR (95% CI)	P-value
rs733331	2	PDK1-RAPGEF4	A	G		0.048 ± 0.009	7.18e-08		0.97(0.92-1.02)	0.1852
rs10815355	9	KANK1	T	G		0.074 ± 0.012	3.727e-10		0.94(0.88-1.01)	0.09945
rs2018860	15	IGF1R	A	T		0.050 ± 0.009	1.716e-08		1.00(0.95-1.06)	0.8548
s.e.m., standard error mean

[truncated: 2 more sheets: Suppl Table 11, Suppl Table 12]
